# Supplementary material
Source: ML conference proceedings conference paper supplement (https://proceedings.neurips.cc/paper_files/paper/2021/hash/f187a23c3ee681ef6913f31fd6d6446b-Abstract.html)
Supplement: Supplementary file 1 [file f187a23c3ee681ef6913f31fd6d6446b-Supplemental.zip]

Archive with 6 entries (4 files):
- supplementary_material/
- supplementary_material/paper_and_appendix.pdf
- supplementary_material/video/
- supplementary_material/video/keeping_balance.mp4
- supplementary_material/video/moving_backward.mp4
- supplementary_material/video/moving_forward.mp4
